# Supplementary material for: Self-medication with over the counter drugs, prevalence of risky practice and its associated factors in pharmacy outlets of Asmara, Eritrea
Source: BMC Public Health. 2019 Feb 6;19:159. doi: 10.1186/s12889-019-6470-5 (PMC6364400; doi:10.1186/s12889-019-6470-5)
Supplement: Supplementary file 1 — Questionnaire for obtaining the knowledge, attitude and practice of self-medication with Over the Counter drugs among pharmacy outlet customers in Asmara, Eritrea. (PDF 327 kb) [file 12889_2019_6470_MOESM1_ESM.pdf]

# Questionnaire - English Version

**Questionnaire for obtaining the knowledge, attitude and practice of self-medication with Over the Counter drugs among pharmacy outlet customers in Asmara, Eritrea**

## SECTION A: SOCIO-DEMOGRAPHY

**Instruction:** Circle, put tick/cross, or write the answer that corresponds with your best answer.

| No  | Socio-demographic questions |  | Answer                                                                                                    | Skip |
|-----|-----------------------------|--|-----------------------------------------------------------------------------------------------------------|------|
| 1.  | Sex                         |  | 1. Male<br>2. Female                                                                                      |      |
| 2.  | Age in years                |  |                                                                                                           |      |
| 3.  | Marital status              |  | 1. Married<br>2. Single<br>3. Divorced<br>4. Widowed                                                      |      |
| 4.  | Highest level of education  |  |                                                                                                           |      |
| 5.  | Occupation                  |  | 1. Governmental<br>2. Private service<br>3. Self employed<br>4. Unemployed<br>5. Student<br>6. House wife |      |
| 6.  | Chronic Illness             |  |                                                                                                           |      |
| 7.  | Pregnancy                   |  | 1. Yes<br>2. No<br>3. Not applicable                                                                      |      |
| 8.  | Lactation                   |  | 1. Yes<br>2. No<br>3. Not applicable                                                                      |      |
| 9.  | Religion                    |  | 1. Christian<br>2. Muslim<br>3. Other, <i>please specify</i><br>_____                                     |      |
| 10. | Ethnic group                |  |                                                                                                           |      |
| 11. | Nationality                 |  |                                                                                                           |      |

## SECTION B: KNOWLEDGE

**Instruction:** Circle your answers on the choices provided at the right side.

| No  | Questions about knowledge                                                                 | Answer                                                                                                                                                                                                                              | Skip |
|-----|-------------------------------------------------------------------------------------------|-------------------------------------------------------------------------------------------------------------------------------------------------------------------------------------------------------------------------------------|------|
| 1.  | Medicines are always used on the prescription of a doctor.                                | 1. Yes<br>2. No<br>3. Don't know                                                                                                                                                                                                    |      |
| 2.  | All Over the Counter drugs are safe and effective.                                        | 1. Yes<br>2. No<br>3. Don't know                                                                                                                                                                                                    |      |
| 3.  | Over the Counter drugs are used for treating diseases like:                               | 1. Hereditary diseases<br>2. Minor illnesses and injuries<br>3. Don't know                                                                                                                                                          |      |
| 4.  | Over the Counter drugs are approved for self-care.                                        | 1. Yes<br>2. No<br>3. Don't know                                                                                                                                                                                                    |      |
| 5.  | Which of the following drugs fall under OTC drugs? (multiple answers)                     | a. Antipyretics<br>b. Anti-cold<br>c. Analgesics<br>d. Anti-microbials                                                                                                                                                              |      |
| 6.  | Over the Counter drugs could be used after their expiry date.                             | 1. Yes<br>2. No<br>3. Don't know                                                                                                                                                                                                    |      |
| 7.  | Over the Counter drugs can:                                                               | 1. Sometimes cause side-effect(s)<br>2. Mostly cause side-effect(s)<br>3. Never cause side-effect(s)<br>4. Don't know                                                                                                               |      |
| 8.  | While using Over the Counter drugs, caution should be taken mostly in: (multiple answers) | a. Pregnancy<br>b. Lactation<br>c. Elderly<br>d. Children<br>e. Adolescent/middle adults                                                                                                                                            |      |
| 9.  | If suspected side-effect(s) are seen, then one should: (multiple answers)                 | a. Immediately stop using the drug<br>b. Take low dose until side effect(s) subside<br>c. Continue taking the drug regardless the side effect(s)<br>d. Report to a Doctor or Pharmacist<br>e. Other, <i>please specify</i><br>_____ |      |
| 10. | All Over the Counter drugs when taken along with prescribed drug are safe.                | 1. Yes<br>2. No<br>3. Don't know                                                                                                                                                                                                    |      |

## SECTION C: ATTITUDE

**Instruction:** For the following section, the choices are represented by numbers in which 1=Strongly disagree, 2=Disagree, 3=Neither agree or disagree, 4=Agree, and 5=Strongly agree. Circle or tick ✓ ONE answer that best matches your general opinion.

| No  | Statements                                                                                                     | Strongly Disagree | Disagree | Neither Agree or Disagree | Agree | Strongly Agree |
|-----|----------------------------------------------------------------------------------------------------------------|-------------------|----------|---------------------------|-------|----------------|
| 1.  | Over the Counter drugs that are used for self-medication are safe.                                             | 1                 | 2        | 3                         | 4     | 5              |
| 2.  | Over the Counter drugs are cheaper and convenient.                                                             | 1                 | 2        | 3                         | 4     | 5              |
| 3.  | Paracetamol in overdose is a powerful poison.                                                                  | 1                 | 2        | 3                         | 4     | 5              |
| 4.  | Over the Counter drugs can modify or alter the action of another drug.                                         | 1                 | 2        | 3                         | 4     | 5              |
| 5.  | All Over the Counter drugs can be used in case of pregnancy.                                                   | 1                 | 2        | 3                         | 4     | 5              |
| 6.  | Pain killers when taken on an empty stomach does not cause gastritis.                                          | 1                 | 2        | 3                         | 4     | 5              |
| 7.  | Over the Counter drugs are not affected by storage conditions, like temperature, moisture and direct sunlight. | 1                 | 2        | 3                         | 4     | 5              |
| 8.  | Liquid medicines could be used when opened after one month.                                                    | 1                 | 2        | 3                         | 4     | 5              |
| 9.  | Eye/Ear drops could be used after one month of opening.                                                        | 1                 | 2        | 3                         | 4     | 5              |
| 10. | It is better I don't take Over the Counter drug when I am ill.                                                 | 1                 | 2        | 3                         | 4     | 5              |
| 11. | Over the Counter drugs are safe but would seek a physician advice before using it.                             | 1                 | 2        | 3                         | 4     | 5              |

## SECTION D: PRACTICE

**Instruction:** Circle your answers on the choices provided at the right side.

| No  | Questions regarding Practice                                                      | Answer                                                                                                                                                                                                             | Skip          |
|-----|-----------------------------------------------------------------------------------|--------------------------------------------------------------------------------------------------------------------------------------------------------------------------------------------------------------------|---------------|
| 1.  | Have ever practiced self-medication with Over the Counter drugs?                  | 1. Yes<br>2. No <span style="float: right;">—————→</span>                                                                                                                                                          | Skip to Q. 18 |
| 2.  | With whom did you consult before using Over the Counter drugs? (multiple answers) | 1. Pharmacist<br>2. Doctor<br>3. Friends/relatives<br>4. Leaflet<br>5. Internet and mobile applications<br>6. Other, <i>please specify</i><br>_____                                                                |               |
| 3.  | When did you consume Over the Counter drugs?                                      | 1. When symptoms are minor/manageable<br>2. Whenever I feel sick<br>3. When I can't visit doctor<br>4. Other, <i>please specify</i><br>_____                                                                       |               |
| 4.  | Common reason(s) for using Over the Counter drugs is: (multiple answers)          | 1. Time saving<br>2. Low cost<br>3. Safe and well tolerable<br>4. Easy accessibility<br>5. Other, <i>please specify</i><br>_____                                                                                   |               |
| 5.  | Which categories of medications are mostly preferred by you for self-medication?  | 1. Antipyretic<br>2. Cough and cold preparation<br>3. Analgesics<br>4. Anti-inflammatory<br>5. Anti-diarrheal<br>6. Antacids<br>7. Vitamin tablets<br>8. Anti-allergic<br>9. Other, <i>please specify</i><br>_____ |               |
| 6.  | Have you ever taken Over the Counter drug(s) more than the recommended dose?      | 1. Yes<br>2. No <span style="float: right;">—————→</span>                                                                                                                                                          | Skip to Q. 8  |
| 7.  | Why did you take more than the recommended dose?                                  |                                                                                                                                                                                                                    |               |
| 8.  | Have you ever experienced adverse effect from Over the Counter drugs?             | 1. Yes<br>2. No <span style="float: right;">—————→</span>                                                                                                                                                          | Skip to Q. 12 |
| 9.  | What was the side-effect(s)?                                                      |                                                                                                                                                                                                                    |               |
| 10. | After what medication was the side-effect(s) experienced?                         |                                                                                                                                                                                                                    |               |
| 11. | What did you do after the side-effect(s)?                                         |                                                                                                                                                                                                                    |               |

|     |                                                                                    |                                                                                                                                                                 |                  |
|-----|------------------------------------------------------------------------------------|-----------------------------------------------------------------------------------------------------------------------------------------------------------------|------------------|
| 12. | How often do you read the instructions on drug's label before use?                 | 1. Always<br>2. Occasionally<br>3. Rarely<br>4. Never                                                                                                           |                  |
| 13. | How often do you check the expiry date?                                            | 1. Always<br>2. Occasionally<br>3. Rarely<br>4. Never                                                                                                           |                  |
| 14. | What do you do in case Over the Counter drug don't work well?                      | 1. I double the dose<br>2. I change other powerful Over the Counter drug<br>3. I go to health facility<br>4. Other, <i>please specify</i><br>_____              |                  |
| 15. | If Over the Counter drugs showed change in shape, color, odor:                     | 1. Immediately discard the drugs<br>2. Continue using till it expires<br>3. Continue using even if after it expires<br>4. Other, <i>please specify</i><br>_____ |                  |
| 16. | Where do you store Over the Counter drugs?                                         | 1. Medicine box<br>2. Bed room / open in the table<br>3. Refrigerator<br>4. Kitchen<br>5. Bathroom<br>6. Other, <i>please specify</i><br>_____                  |                  |
| 17. | What is the average number of Over the Counter drugs that you are using per month? |                                                                                                                                                                 |                  |
| 18. | Type of the medication purchased                                                   | 1. OTC drug<br>2. Prescription Only Medicine →<br>3. Both                                                                                                       | End of Interview |
| 19. | Name of the purchased OTC drug                                                     |                                                                                                                                                                 |                  |
| 20. | Ailment want to be treated                                                         |                                                                                                                                                                 |                  |

**Thank you very much for completing this questionnaire!**
